# Supplementary material for: A Systems Biology and LASSO-Based Approach to Decipher the Transcriptome–Interactome Signature for Predicting Non-Small Cell Lung Cancer
Source: MDPI journal article supplement (doi:10.3390/biology11121752), 2022-11-30
Supplement: s1 [file s1]

**Table S1:** The number of samples in the test dataset 2 (TD2) used to assess the performance of the LASSO model.

| <b>GEO accession</b>           | <b>Lung cancer sample</b> | <b>Adjacent non-tumor sample</b> |
|--------------------------------|---------------------------|----------------------------------|
| GSE18842                       | 46                        | 45                               |
| GSE27262                       | 25                        | 25                               |
| GSE19804                       | 60                        | 60                               |
| <b>Total number of samples</b> | <b>131</b>                | <b>130</b>                       |

**Table S2:** List of the top 20 DEGs based on log2FC values.

| Upregulate genes   |        |           |           | Downregulated genes  |        |           |           |
|--------------------|--------|-----------|-----------|----------------------|--------|-----------|-----------|
| Gene               | log2FC | p.value   | adj.p.val | Gene                 | log2FC | p.value   | adj.p.val |
| <i>CST1</i>        | 7.58   | 8.36E-274 | 6.51E-272 | <i>DEFA1B</i>        | -7.38  | 0         | 0         |
| <i>FAM83A</i>      | 6.70   | 2.38E-290 | 2.52E-288 | <i>SLC6A4</i>        | -6.98  | 0         | 0         |
| <i>KRT16</i>       | 6.69   | 2.97E-141 | 2.90E-140 | <i>DEFA1</i>         | -6.93  | 0         | 0         |
| <i>MMP13</i>       | 6.69   | 9.43E-215 | 2.74E-213 | <i>SFTPC</i>         | -6.81  | 4.12E-129 | 3.34E-128 |
| <i>MMP12</i>       | 6.40   | 3.53E-275 | 2.82E-273 | <i>CA4</i>           | -6.63  | 0         | 0         |
| <i>CA9</i>         | 6.33   | 2.56E-226 | 9.01E-225 | <i>DEFA3</i>         | -6.62  | 7.17E-296 | 8.27E-294 |
| <i>TMPRSS11E</i>   | 6.33   | 5.03E-219 | 1.56E-217 | <i>CD300LG</i>       | -6.57  | 0         | 0         |
| <i>AKR1B10</i>     | 6.30   | 1.67E-120 | 1.19E-119 | <i>FCN3</i>          | -6.32  | 0         | 0         |
| <i>PRAME</i>       | 6.30   | 1.08E-155 | 1.31E-154 | <i>ILIRL1</i>        | -6.26  | 0         | 0         |
| <i>TMPRSS4</i>     | 6.26   | 2.19E-300 | 2.79E-298 | <i>ADAMTS7P3</i>     | -6.19  | 0         | 0         |
| <i>GPR87</i>       | 6.25   | 2.93E-180 | 5.20E-179 | <i>ADH1B</i>         | -6.18  | 6.75E-226 | 2.35E-224 |
| <i>RP11-40C6.2</i> | 6.08   | 8.95E-287 | 8.83E-285 | <i>RP11-286H15.1</i> | -6.16  | 0         | 0         |
| <i>PITX1</i>       | 5.98   | 7.18E-229 | 2.62E-227 | <i>ADRA1A</i>        | -6.11  | 0         | 0         |
| <i>AP000349.2</i>  | 5.91   | 2.90E-270 | 2.11E-268 | <i>ADAMTS8</i>       | -6.03  | 0         | 0         |
| <i>SERPINB5</i>    | 5.90   | 9.51E-124 | 7.10E-123 | <i>TMEM100</i>       | -6.02  | 0         | 0         |
| <i>GJB2</i>        | 5.83   | 2.27E-267 | 1.57E-265 | <i>GRIA1</i>         | -6.02  | 9.82E-305 | 1.42E-302 |
| <i>RP5-940J5.9</i> | 5.83   | 7.68E-118 | 5.25E-117 | <i>CLDN18</i>        | -5.96  | 3.76E-177 | 6.33E-176 |
| <i>MMP11</i>       | 5.77   | 0         | 0         | <i>MYOC</i>          | -5.90  | 0         | 0         |
| <i>CASC9</i>       | 5.67   | 1.11E-157 | 1.40E-156 | <i>BTNL9</i>         | -5.86  | 0         | 0         |
| <i>CYP24A1</i>     | 5.66   | 3.31E-173 | 5.25E-172 | <i>AGER</i>          | -5.78  | 2.54E-288 | 2.59E-286 |

**Table S5:** Genes with non-zero coefficients selected by using LASSO.

| Gene             | coefficient | log2FC |
|------------------|-------------|--------|
| <i>Intercept</i> | -3.207      |        |
| <i>KANK2</i>     | -1.016      | -2.27  |
| <i>CLEC4D</i>    | -0.929      | -2.59  |
| <i>ADRB2</i>     | -0.64       | -2.84  |
| <i>CRYAB</i>     | -0.533      | -2.33  |
| <i>NR4A1</i>     | -0.322      | -2.7   |
| <i>CMTM5</i>     | -0.297      | -4.13  |
| <i>ZBTB16</i>    | -0.174      | -5.06  |
| <i>ACTC1</i>     | -0.12       | -3.66  |
| <i>RAD51</i>     | -0.118      | 3.14   |
| <i>KIF23</i>     | -0.117      | 2.62   |
| <i>SYNE3</i>     | -0.087      | -2.41  |
| <i>CLEC4E</i>    | 0.136       | -2.46  |
| <i>CDKN2A</i>    | 0.403       | 2.86   |
| <i>EGLN3</i>     | 0.459       | 2.35   |
| <i>KIF14</i>     | 0.675       | 3.73   |
| <i>RECQL4</i>    | 1.372       | 2.5    |
| <i>CDH1</i>      | 1.457       | 2.31   |

**Table S6:** The 17-gene signature of the LASSO model is associated with different gene families according to the Molecular Signature Database (MSigDB).

|                              | cytokines and growth factors | transcription factors | homeodomain proteins | cell differentiation markers | protein kinases | translocated cancer genes | oncogenes | tumor suppressors    |
|------------------------------|------------------------------|-----------------------|----------------------|------------------------------|-----------------|---------------------------|-----------|----------------------|
| tumor suppressors            | 0                            | 0                     | 0                    | CDH1                         | 0               | 0                         | 0         | RECQL4, CDKN2A, CDH1 |
| oncogenes                    | 0                            | ZBTB16                | 0                    | 0                            | 0               | ZBTB16                    | ZBTB16    |                      |
| translocated cancer genes    | 0                            | ZBTB16                | 0                    | 0                            | 0               | ZBTB16                    |           |                      |
| protein kinases              | 0                            | 0                     | 0                    | 0                            | 0               |                           |           |                      |
| cell differentiation markers | 0                            | 0                     | 0                    | CDH1                         |                 |                           |           |                      |
| homeodomain proteins         | 0                            | 0                     | 0                    |                              |                 |                           |           |                      |
| transcription factors        | 0                            | NR4A1, ZBTB16         |                      |                              |                 |                           |           |                      |
| cytokines and growth factors | CMTM5                        |                       |                      |                              |                 |                           |           |                      |

**Table S7:** Performance of the LASSO model on the independent TD2 dataset GSE18842.

| Threshold  | Accuracy     | Specificity | Sensitivity  | TN        | TP        | FN       | FP       | NPV          | PPV          |
|------------|--------------|-------------|--------------|-----------|-----------|----------|----------|--------------|--------------|
| 0          | 0.505        | 0           | 1.000        | 0         | 46        | 0        | 45       | NA           | 0.505        |
| 0.1        | 1.000        | 1           | 1.000        | 45        | 46        | 0        | 0        | 1.000        | 1.000        |
| 0.2        | 1.000        | 1           | 1.000        | 45        | 46        | 0        | 0        | 1.000        | 1.000        |
| 0.3        | 1.000        | 1           | 1.000        | 45        | 46        | 0        | 0        | 1.000        | 1.000        |
| 0.4        | 1.000        | 1           | 1.000        | 45        | 46        | 0        | 0        | 1.000        | 1.000        |
| <b>0.5</b> | <b>1.000</b> | <b>1</b>    | <b>1.000</b> | <b>45</b> | <b>46</b> | <b>0</b> | <b>0</b> | <b>1.000</b> | <b>1.000</b> |
| 0.6        | 0.978        | 1           | 0.957        | 45        | 44        | 2        | 0        | 0.957        | 1.000        |
| 0.7        | 0.967        | 1           | 0.935        | 45        | 43        | 3        | 0        | 0.938        | 1.000        |
| 0.8        | 0.934        | 1           | 0.870        | 45        | 40        | 6        | 0        | 0.882        | 1.000        |
| 0.9        | 0.901        | 1           | 0.804        | 45        | 37        | 9        | 0        | 0.833        | 1.000        |
| 1          | 0.495        | 1           | 0.000        | 45        | 0         | 46       | 0        | 0.495        | NA           |

**Table S8:** Performance of the LASSO model on the independent TD2 dataset GSE27262.

| Threshold  | Accuracy     | Specificity | Sensitivity  | TN        | TP        | FN       | FP       | NPV          | PPV          |
|------------|--------------|-------------|--------------|-----------|-----------|----------|----------|--------------|--------------|
| 0          | 0.500        | 0           | 1.000        | 0         | 25        | 0        | 25       | NA           | 0.500        |
| 0.1        | 1.000        | 1           | 1.000        | 25        | 25        | 0        | 0        | 1.000        | 1.000        |
| 0.2        | 1.000        | 1           | 1.000        | 25        | 25        | 0        | 0        | 1.000        | 1.000        |
| 0.3        | 1.000        | 1           | 1.000        | 25        | 25        | 0        | 0        | 1.000        | 1.000        |
| <b>0.4</b> | <b>1.000</b> | <b>1</b>    | <b>1.000</b> | <b>25</b> | <b>25</b> | <b>0</b> | <b>0</b> | <b>1.000</b> | <b>1.000</b> |
| <b>0.5</b> | <b>0.980</b> | <b>1</b>    | <b>0.960</b> | <b>25</b> | <b>24</b> | <b>1</b> | <b>0</b> | <b>0.962</b> | <b>1.000</b> |
| 0.6        | 0.980        | 1           | 0.960        | 25        | 24        | 1        | 0        | 0.962        | 1.000        |
| 0.7        | 0.920        | 1           | 0.840        | 25        | 21        | 4        | 0        | 0.862        | 1.000        |
| 0.8        | 0.920        | 1           | 0.840        | 25        | 21        | 4        | 0        | 0.862        | 1.000        |
| 0.9        | 0.860        | 1           | 0.720        | 25        | 18        | 7        | 0        | 0.781        | 1.000        |
| 1          | 0.500        | 1           | 0.000        | 25        | 0         | 25       | 0        | 0.500        | NA           |

**Table S9:** Performance of the LASSO model on the independent TD2 dataset GSE19804.

| Threshold  | Accuracy     | Specificity  | Sensitivity  | TN        | TP        | FN        | FP       | NPV          | PPV          |
|------------|--------------|--------------|--------------|-----------|-----------|-----------|----------|--------------|--------------|
| 0          | 0.500        | 0.000        | 1.000        | 0         | 60        | 0         | 60       | NA           | 0.500        |
| 0.1        | 0.808        | 0.983        | 0.633        | 59        | 38        | 22        | 1        | 0.728        | 0.974        |
| 0.2        | 0.792        | 1.000        | 0.583        | 60        | 35        | 25        | 0        | 0.706        | 1.000        |
| 0.3        | 0.742        | 1.000        | 0.483        | 60        | 29        | 31        | 0        | 0.659        | 1.000        |
| 0.4        | 0.725        | 1.000        | 0.450        | 60        | 27        | 33        | 0        | 0.645        | 1.000        |
| <b>0.5</b> | <b>0.725</b> | <b>1.000</b> | <b>0.450</b> | <b>60</b> | <b>27</b> | <b>33</b> | <b>0</b> | <b>0.645</b> | <b>1.000</b> |
| 0.6        | 0.725        | 1.000        | 0.450        | 60        | 27        | 33        | 0        | 0.645        | 1.000        |
| 0.7        | 0.717        | 1.000        | 0.433        | 60        | 26        | 34        | 0        | 0.638        | 1.000        |
| 0.8        | 0.658        | 1.000        | 0.317        | 60        | 19        | 41        | 0        | 0.594        | 1.000        |
| 0.9        | 0.625        | 1.000        | 0.250        | 60        | 15        | 45        | 0        | 0.571        | 1.000        |
| 1          | 0.500        | 1.000        | 0.000        | 60        | 0         | 60        | 0        | 0.500        | NA           |
